# 1 Low Dose Ionizing Radiation Strongly Stimulates Insertional 2 Mutagenesis in a $\gamma$ H2AX Dependent Manner

3  
4  
5  
6 Alex N. Zelensky<sup>1,2\*</sup>, Mascha Schoonakker<sup>1</sup>, Inger Brandsma<sup>1</sup>, Marcel Tijsterman<sup>3</sup>,

7 Dik C. van Gent<sup>1,2</sup>, Jeroen Essers<sup>1,4,5</sup>, Roland Kanaar<sup>1,2\*</sup>

8  
9  
10  
11 <sup>1</sup>Department of Molecular Genetics, <sup>2</sup>Oncode Institute, Erasmus MC, PO Box 2040, 3000 CA,  
12 Rotterdam, The Netherlands

13 <sup>3</sup>Human Genetics, Leiden University Medical Center, PO Box 9600, 2300 RC, Leiden, The Netherlands

14 <sup>4</sup>Department of Radiation Oncology, Erasmus MC, PO Box 2040, 3000 CA, Rotterdam, The  
15 Netherlands

16 <sup>5</sup>Department of Vascular Surgery, Erasmus MC, PO Box 2040, 3000 CA, Rotterdam, The Netherlands

17 \* Corresponding authors: [r.kanaar@erasmusmc.nl](mailto:r.kanaar@erasmusmc.nl) and [a.zelensky@erasmusmc.nl](mailto:a.zelensky@erasmusmc.nl)

## 1 Abstract

2 Extrachromosomal DNA can integrate into the genome with no sequence specificity producing an  
3 insertional mutation. This process, which is referred to as random integration (RI), requires a double  
4 stranded break (DSB) in the genome. Inducing DSBs by various means, including ionizing radiation,  
5 increases the frequency of integration. Here we report that non-lethal physiologically relevant doses  
6 of ionizing radiation (10-100 mGy), within the range produced by medical imaging equipment,  
7 stimulate RI of transfected and viral episomal DNA in human and mouse cells with an extremely high  
8 efficiency. Genetic analysis of stimulated RI (S-RI) revealed that it is distinct from the background RI,  
9 requires histone H2AX S139 phosphorylation ( $\gamma$ H2AX) and is not reduced by DNA polymerase  $\theta$  (Polq)  
10 inactivation. S-RI efficiency was unaffected by the main DSB repair pathway (homologous  
11 recombination and non-homologous end joining) disruptions, but double deficiency in MDC1 and  
12 53BP1 phenocopies  $\gamma$ H2AX inactivation. The robust responsiveness of S-RI to physiological amounts of  
13 DSBs has implications for radiation risk assessment and can be exploited for extremely sensitive,  
14 macroscopic and direct detection of DSB-induced mutations.

### 15 16 17 18 Keywords:

19 Random integration, extrachromosomal DNA, insertional mutagenesis,  $\gamma$ H2AX, DSB repair, low dose  
20 irradiation.  
21  
22  
23

## 1 Introduction

2 Extrachromosomal DNA – endogenous, viral or transfected – can integrate into the genomic DNA,  
3 resulting in an insertional mutation. This type of mutagenesis has been primarily studied in the  
4 context of exogenous DNA that enters the nucleus as a result of transfection or viral infection, and  
5 has several important practical implications [1]. It is used to produce transgenic cell lines and  
6 organisms for research and biotechnological applications. Random integration (RI) of transcription-  
7 blocking constructs has been exploited as a form of untargeted but traceable mutagenesis (“gene  
8 trapping”). Integration of exogenous DNA is an important factor in several therapeutic approaches,  
9 where it is regarded as beneficial (stable restoration of a missing gene) or dangerous (insertion near  
10 an oncogene and its activation). Viral integration into the genome has been considered as a  
11 contributing factor in oncogenesis, even for viruses that do not encode an active integration function  
12 [2]. During precise homology-driven modification of the genome (gene targeting), random integration  
13 of the targeting construct is an unwanted side effect that severely limits the application of this  
14 powerful technique in the vast majority of organisms [3].

15 The presence of extrachromosomal DNA is a physiological condition, as a sizable pool of it exists in  
16 the majority of normal cells in tissues, and includes fragments of nuclear and mitochondrial DNA  
17 released due to damage repair, telomeric DNA circles [4], non-integrating viral genomes [5], mobile  
18 genetic elements and phagocytized extracellular DNA [6]. According to one estimate, the relative  
19 fraction of such extrachromosomal DNA in normal tissues can be substantial, reaching 0.1-0.2% of  
20 total DNA content [7], which is comparable to other major genomic components such as telomeres  
21 (0.4%). How episomal DNA interacts with the genomic DNA and repair systems is not well  
22 understood.

23 Insertion of exogenous DNA into a chromosome can be described by a simple and intuitive model as  
24 mis-repair of a double strand break (DSB) in the genomic DNA by non-homologous end joining that  
25 traps an extrachromosomal DNA fragment happening to be in the vicinity of the DSB [8,9]. This model  
26 predicts that the proximity of an ongoing DSB repair event to an extrachromosomal DNA molecule  
27 will determine the frequency of the insertion, and therefore that increasing the frequency of DSBs  
28 above background by inflicting additional damage will increase the likelihood of integration. This  
29 prediction has been confirmed numerous times in various cell lines and with different DNA vectors  
30 using doses of > 0.5 Gy of ionizing radiation ( $\gamma$ - and X-rays), which is arguably the best-studied method  
31 of DSB induction [10-23]. RI stimulation by DSB-inducing chemicals and enzymes has also been  
32 demonstrated, as well as some non-DSB inducing genotoxic agents.<sup>16,21,24-35</sup> In the latter case the  
33 stimulation can be explained by indirect DSB induction during replication.

34 Genomic integration of extrachromosomal DNA is referred to in the existing literature as RI,  
35 illegitimate recombination, illegitimate integration, stable integration, stable transformation, non-  
36 homologous integration or insertional mutation [8]. Although it is not perfect, we chose to use the

1 first term. In the context of RI stimulated by DNA lesions we use the term stimulated RI (S-RI). Here  
2 we report the following, and to our knowledge so far unidentified, properties of the S-RI  
3 phenomenon. Firstly, we found that extremely low doses (10-50 mGy), similar to those encountered  
4 during routine medical diagnostic procedures, strongly stimulate the integration of transfected DNA  
5 and episomal viral DNA. Secondly, a screen of multiple knock-out mouse embryonic stem (ES) cell  
6 lines revealed that contrary to expectation, disruption of the two major DSB repair pathways has no  
7 effect on S-RI, and thirdly we showed that phosphorylation of H2AX on serine 139 and recruitment of  
8 the adaptor protein MDC1, involved in DNA damage response, are essential for the process.

## 9 Results

### 10 Integration is strongly stimulated by physiologically relevant doses of radiation

11 To investigate the effect of low dose irradiation (< 1 Gy) on RI we transfected ES cells by  
12 electroporation with circular or linearized plasmid DNA containing a puromycin resistance gene,  
13 divided the cells equally over several culture dishes, and irradiated the dishes using <sup>137</sup>Cs γ-irradiation  
14 source with a set of doses ranging from 0.01 to 1 Gy [Fig 1A,B]. Remarkably, even the lowest dose  
15 tested already led to an increase in the number of puromycin-resistant colonies formed after 6-8 days  
16 of selection [Fig 1B], with a 7.5±0.8 -fold increase at a dose of 200 mGy. The response was linear  
17 between 10 and 200 mGy, then plateaued between 200 and 500 mGy, and decreased at 1 Gy.

18 The sensitivity of the response to the extremely low doses, the plateauing dose response, and the  
19 high magnitude of the stimulation (up to 10-fold) distinguish our findings from numerous previous  
20 reports of the phenomenon, as they generally studied doses above 1 Gy [12-19,22]. It is remarkable  
21 that the exquisite sensitivity of the assay to physiologically relevant amounts of induced DNA damage  
22 appears to have escaped experimental scrutiny for more than half a century. Intrigued by this, we  
23 went on to verify the generality of the S-RI phenomenon using different DSB induction methods, cell  
24 lines, DNA vectors and assay endpoints. The lower end of the dose range we tested overlaps the dose  
25 range of certain medical imaging procedures (e.g. 1-30 mGy for computed tomography (CT) and  
26 fluoroscopy [24]). We scanned freshly transfected ES cell suspension in a micro-CT instrument  
27 (Quantum FX, PerkinElmer) used for mouse imaging. One to five sequential scans were performed at  
28 the lowest resolution, each scan delivering 13 mGy based on the manufacturer's data. A single scan  
29 produced a clear increase in integration frequency (2.28 ±0.17, n=7) and consecutive scans resulted in  
30 a dose response curve similar to what we observed with the <sup>137</sup>Cs source [Fig 1C]. Human HeLa cells  
31 transfected with the plasmid DNA by electroporation or lipofection performed similarly to mES cells in  
32 the S-RI colony formation assay [Fig S1A,B].

33 To confirm that our observations were not limited to plasmid DNA transfection or antibiotic selection,  
34 we performed S-RI experiments using non-replicating episomal viral vectors and with fluorescent  
35 marker detection by FACS. Recombinant adeno-associated virus type 2 (rAAV2) has a single-stranded

1 DNA genome, and while it can integrate in cultured human cells with some sequence specificity  
2 conferred by the *rep* protein, wild-type AAV2 infecting human tissues and *rep*-deleted rAAV2 vectors  
3 persist as episomes and integrate infrequently and with no detectable specificity [5,25]. We added  
4 lysates containing rAAV2 particles encoding GFP to the HeLa cell culture media, incubated overnight  
5 to allow infection to occur, re-seeded the cells into a series of dishes and irradiated them with 0.02-1  
6 Gy. The fraction of cells expressing GFP was ~60% two days after the infection and gradually  
7 decreased over time due to dilution and loss of rAAV2-GFP episomes in dividing cells. At day 13 only  
8 0.05-0.1% of unirradiated cells remained GFP-positive, presumably due to stable integration [26]. The  
9 GFP-positive fraction increased linearly with the dose in irradiated cells [Fig 1D, S1C]. Transfection of  
10 human U2OS cells with plasmid DNA containing a GFP minigene, followed by FACS 14-21 days later,  
11 further confirmed that selection is not required to observe the S-RI effect [Fig S1D]. We also observed  
12 S-RI [Fig 1E] with integrase-deficient HIV-1 lentiviral (IDLV) vectors [27,28] whose RNA genomes are  
13 reverse-transcribed normally, but accumulate as circular or linear episomal DNA because of the  
14 inactivating D64V mutation in the integrase [29].

15 Both IDLV and rAAV vectors were used previously to detect nuclease-induced DSBs [26,30,31]. To  
16 show that transfected plasmid DNA also integrates at the DSBs we used the DiVA-AID cell line, which  
17 allows precise control over nuclear localization and degradation of the AsiSI nuclease that has  
18 hundreds of recognition sites in human genome [32]. We added 4-hydroxytamoxifen to induce AsiSI  
19 breaks immediately after the transfection of plasmid DNA, and controlled the DSB dose by inducing  
20 AsiSI degradation by adding auxin to the media 1 or 4 hours later [Fig 1F]. The dose-dependent  
21 increase in the number of colonies we observed was consistent with the results we obtained using  
22 ionizing radiation.

23 To better characterize the parameters affecting S-RI we studied its dependence on the timing of  
24 irradiation and on the amount of transfected DNA. The stimulatory effect of irradiation dropped  
25 precipitously shortly after transfection, but was still observed as late as 24 hours later when circular  
26 plasmid DNA was used [Fig S1E,F]. We also performed an experiment in which the order of  
27 transfection and irradiation was reversed, and still observed a stimulatory effect [Fig S1G]. This  
28 demonstrates that S-RI is caused by the effect of IR on the host cell rather than on the transfected  
29 DNA, further supporting the notion that the stimulation is achieved by DSB induction in the genomic  
30 DNA. By modifying the amount of DNA electroporated into mES cells we revealed a striking and  
31 opposing effects on S-RI and background RI [Fig 1G, S1H,I]. When DNA amounts were low (2  $\mu$ g), S-RI  
32 was very efficient, and background RI was low, while when high amount of DNA was electroporated  
33 (100  $\mu$ g), S-RI became inefficient, and background RI increased.

#### 34 S-RI requires $\gamma$ H2AX but not HR or NHEJ

35 A simple explanation to S-RI is that radiation creates DSBs into which transfected DNA can be ligated.  
36 This model predicts that cells in which major DSB repair mechanisms, such as homologous

1 recombination (HR) and non-homologous end joining (NHEJ), are disrupted, will be more responsive  
2 to S-RI, unless the repair deficiency negatively affects the enzymes involved in integration itself. We  
3 performed the S-RI assay in mES cell lines where key DNA damage repair and response genes were  
4 genetically inactivated. Surprisingly, we observed wild-type dose response curves in *Rad54*<sup>-/-</sup> ES cells,  
5 which have an HR deficiency phenotype [33], and in *p53*<sup>-/-</sup> cells lacking key DNA damage signaling  
6 mediator, while in *DNA-PKcs*<sup>-/-</sup> (*Prkdc*<sup>-/-</sup>) cells deficient in a canonical NHEJ enzyme [34] a small  
7 reduction in S-RI was observed [Fig 2A]. We recently demonstrated that in mES cells DNA polymerase  
8  $\theta$  is responsible for the majority of background RI [35], and canonical NHEJ proteins Ku70, Ku80 and  
9 LigIV become important in the absence of Pol  $\theta$ ; and similar observations were reported in human  
10 cells [36]. Surprisingly, S-RI was increased rather than suppressed in the Pol  $\theta$ -deficient cells (*Polq*<sup>-/-</sup>),  
11 and in the Ku mutants [Fig 2B], which suggests that S-RI and background RI have distinct genetic  
12 dependencies.

13 In sharp contrast, cells deficient for H2AX [37,38], a histone variant whose post-translational  
14 modifications are central to DNA damage response signaling, were near-completely immune to RI  
15 stimulation by irradiation [Fig 2A]. This was difficult to reconcile with the previously described  
16 phenotypes of *H2ax*<sup>-/-</sup> cells, which are prone to translocations [39,40] suggesting increased frequency  
17 of DSBs in the absence of a major NHEJ defect. Background RI was normal in *H2ax*<sup>-/-</sup> lines [Fig S2A],  
18 further indicating that RI and S-RI are genetically distinct processes.

19 The S-RI defect was observed in two different *H2ax*<sup>-/-</sup> cell lines and could be reverted by inserting a  
20 wild-type copy of *H2ax* into the *Rosa26* “safe harbor” locus [Fig 2C, S2B,C]. We also tested variants of  
21 H2AX with mutations in residues that are phosphorylated (S139) or ubiquitinated (K13, K15, K118,  
22 K119) during DNA damage response signaling [41-43], as well as Y142 required for interaction with  
23 the key downstream effector MDC1 [44]. Mutations in the lysines – these residues are common to all  
24 H2A variants – did not impair S-RI, while S139A and Y142A mutants were indistinguishable from  
25 uncomplemented *H2ax*<sup>-/-</sup> cells [Fig 2C].

26 To determine if S-RI was permanently blocked or just stunted by *H2ax* inactivation we performed a  
27 broad-dose S-RI experiment [Fig 2D, S2D], using doses up to 3 Gy. The gradual increase in S-RI  
28 efficiency we observed in *H2ax*<sup>-/-</sup> cells in this dose range indicated that the end joining reaction  
29 responsible for the ligation of extrachromosomal DNA into the IR-induced DSB was inherently  
30 functional, but less efficient in the absence of H2AX. *H2ax*<sup>-/-</sup> cells were also deficient for RI stimulation  
31 by etoposide [Fig 2E], one of DNA topoisomerase II inhibitors, which were previously shown to be  
32 potent RI stimulators [45-47].

33 Finally, we wondered, which of the checkpoint kinases [48] phosphorylating H2AX at the sites of DNA  
34 damage is involved in S-RI. Therefore, we performed experiments in the presence of chemical  
35 inhibitors: KU-55933 specific for ATM [49], VE-821 specific for ATR [50], wortmannin that has highest  
36 specificity for DNA-PKcs [51], and UCN-01 for Chk1 [52] at the concentrations we previously found to  
37 be effective in mouse ES cells [53]. We also tested the effect of caffeine, which is widely used as a

1 broadly specific ATM/ATR/DNA-PKcs inhibitor, but which we found to lack this activity in ES cells, and  
2 to strongly suppress gene targeting by HR [53-55]. Inhibition of ATM and ATR reduced S-RI efficiency  
3 [Fig S2E], and the combination of the two inhibitors had an additive effect, which was even more  
4 pronounced in *DnaPKcs*<sup>-/-</sup> cells [Fig S2E]. In contrast UCN-01, caffeine and wortmannin had no effect  
5 on S-RI. Taken together these results indicate that S-RI is dependent on phosphorylation of H2AX by  
6 one of the partially redundant DNA damage response kinases.

## 7 Role of $\gamma$ H2AX-Binding Proteins

8 Three proteins have been shown to directly bind H2AX in phospho-S139 dependent manner: MDC1  
9 [44], 53BP1 [56] and MCPH1 [57]. We engineered a series of mES knock-out cell lines [Fig 3, S3-S5] to  
10 test if S-RI deficiency in cells that cannot form  $\gamma$ H2AX is due to the failed recruitment of these  
11 proteins. Based on its role in promoting DSB repair via NHEJ over HR, 53BP1 would be a good  
12 candidate for the role of the downstream effector, however neither the knock-out nor shRNA knock-  
13 down of 53BP1 affected S-RI or background RI [Fig 3A, S3A,B, S4]. The most pronounced phenotype  
14 of MDC1-deficient cells was a significant reduction in background RI, similar in magnitude to what we  
15 reported previously for Pol  $\theta$  [35]. However, unlike in Pol  $\theta$ -deficient cells [Fig 2B], S-RI was partially  
16 suppressed in *Mdc1*<sup>-/-</sup> cells [Fig 3A], and reduced even further in the double *Mdc1*<sup>-/-</sup>*53bp1*<sup>-/-</sup> knock-out  
17 line. Inactivation of *Mdc1* in *H2ax*<sup>-/-</sup> cells did not further suppress S-RI, consistent with the  
18 downstream role of MDC1 in  $\gamma$ H2AX signaling. *Mcph1* knock-out cells behaved like wild-type in the S-  
19 RI assay, but had elevated background RI. The *Mcph1* mutation also reverted the partial suppression  
20 of S-RI by *Mdc1* inactivation, as *Mdc1*<sup>-/-</sup>*Mcph1*<sup>-/-</sup> double mutant showed the same S-RI efficiency as  
21 wild-type cells. Since we established that MDC1 contributes to both RI and S-RI efficiency, the positive  
22 effect of MCPH1 deletion can be explained by its competition with MDC1 for phospho-S139 binding.

## 23 Discussion

24 We used a simple assay to re-examine a phenomenon known since the early days of research on  
25 cultured eukaryotic cells [22,23]. This makes a number of unexpected observations regarding  
26 radiation-stimulated integration of extrachromosomal DNA we present here all the more interesting.  
27 The most important of them are: high sensitivity to very low, physiologically relevant doses of  
28 irradiation, non-linear dose dependence, independence of the best known DSB repair pathways, NHEJ  
29 and HR, requirement of  $\gamma$ H2AX for stimulated but not background RI, and the complex involvement of  
30  $\gamma$ H2AX-interacting proteins.

31 Despite numerous reports describing the stimulation of RI by ionizing radiation, to our knowledge our  
32 study for the first time reports the effects of doses <0.5 Gy, and in particular the striking dose-  
33 dependent stimulation in the range 0.01-0.2 Gy. Previous studies performed with a dose range of 1-  
34 10 Gy with different vertebrate cell lines, vectors and transfection methods, observed linear dose  
35 dependence of stable colony numbers after adjustment for IR-induced reduction in survival

1 [12,15,18,19,22,23]. Explanation of the dose-response curve plateauing we observed in the majority  
2 of experimental systems we used [Fig 1, S1], and seen in some previous studies [14,17], requires a  
3 model that considers more than just chromosomal DSBs as the factor limiting extrachromosomal DNA  
4 integration. What can be the other bottleneck(s)? Transfection efficiency is clearly not one, as the  
5 frequency of stable integration events ( $10^{-2}$ - $10^{-4}$ ) is orders of magnitude lower than the number of  
6 transfected cells ( $>10^1$ ). Furthermore, we observed that decreasing the amount of transfected DNA  
7 makes S-RI *more* efficient. The nature of the barrier limiting S-RI, which may be cell-intrinsic (e.g.  
8 capacity of a DNA-binding protein, signals triggered by DSBs or transfected DNA above a certain  
9 threshold), or reflect heterogeneity in the cell population, remains to be determined.

## 10 $\gamma$ H2AX as a central factor involved in stimulated random integration

11 We observed a striking and unanticipated difference in S-RI between the wild-type and the *H2ax*<sup>-/-</sup> ES  
12 cells. Although  $\gamma$ H2AX is a widely used DNA damage marker and actively studied as such [reviewed by  
13 58], the effects of H2AX deficiency on cells and organisms are generally described as “moderate” or  
14 “mild” [37,38,59-62], and [Fig S2D]. The near-absolute dependence of S-RI on  $\gamma$ H2AX is among the  
15 most striking H2AX phenotypes discovered to date. Several ways a DNA repair protein may affect RI  
16 can be envisaged: by direct involvement in the NHEJ reaction, indirectly by influencing DSB repair  
17 pathway choice or facilitating NHEJ protein recruitment etc., or by changing DSB persistence (longer  
18 half-lives due to inefficient repair will increase the probability of encounter between a genomic DSB  
19 and an extrachromosomal DNA molecule). Other indirect effects through chromatin mobility or  
20 packing (accessibility) can also be considered.

21 H2AX contributes to efficient repair of DSBs by NHEJ. H2AX-deficient cells have increased frequency  
22 of both background and induced chromosomal aberrations [37,38,61]. V(D)J recombination although  
23 superficially normal in *H2ax*<sup>-/-</sup> mice [37,38] has hidden alterations revealed by additional inactivation  
24 of p53, Artemis or XLF [58]. On the other hand, sensitivity of H2AX-deficient cells to ionizing radiation  
25 ranges from moderate [37] to marginally detectable [61], and is always lower than core NHEJ mutants  
26 [37]. Moreover, some of this increased sensitivity can be attributed to impaired HR [38,61,63,64] and  
27 a compromised G2/M DNA damage checkpoint [61,65]. Assays monitoring mutagenic repair of  
28 nuclease-induced DSBs in a chromosomal reporter revealed no effect of H2AX deletion [66]. Data on  
29 DSB clearance kinetics in H2AX-deficient cells is conflicting (refs [38,59] vs [67]). Thus, previously  
30 described involvement of H2AX in NHEJ does not provide a compelling explanation to S-RI  
31 suppression.

32 Among  $\gamma$ H2AX-binding proteins 53BP1 was a prime candidate for the role of the  $\gamma$ H2AX-dependent S-  
33 RI mediator [68,69], as its retention at DSBs is  $\gamma$ H2AX-dependent [62], it promotes DSB repair by NHEJ  
34 over HR [70], facilitates of the synapsis between distal DSBs [71] and increases the mobility of a  
35 chromosomal DSBs [72]. However, we could only observe the effect of 53BP1 deletion on S-RI when  
36 MDC1 was also absent. Moreover, we found that MDC1 rather than 53BP1 contributes to background



1 RI, which was also observed previously in human cells [44,73], and deletion of 53BP1 had no  
2 significant effect even when combined with *Mdc1* inactivation. While several studies showed that  
3 53BP1 recruitment to ionizing radiation-induced foci is controlled by MDC1 [74-76], our results  
4 suggest an MDC1-independent role of 53BP1, as double mutation *Mdc1*<sup>-/-</sup>*53bp1*<sup>-/-</sup> is required to  
5 recapitulate the effect of H2AX deficiency on S-RI.

## 6 Are S-RI and RI distinct processes?

7 The S-RI and background RI have distinct genetic dependencies: while  $\gamma$ H2AX is required for S-RI, its  
8 loss does not affect background RI; Pol  $\theta$  has an opposite effect: it is responsible for the majority of  
9 background RI events, but its deletion does not impair S-RI; Inactivation of *Mdc1* severely impairs  
10 background RI [44,73], but has a much smaller effect on S-RI; *Mcp1* knock-out increases RI efficiency,  
11 but has no effect on S-RI unless *Mdc1* is also inactivated. These observations can be interpreted as an  
12 indication that S-RI and RI are mechanistically different. However, the models based on this  
13 supposition and accommodating the observation we present here and previously [35] are inevitably  
14 complex [Fig S3C], and require some uncomfortable assumptions. For example, we found that two  
15 out of three  $\gamma$ H2AX-binding proteins we studied affect background RI (MDC1 stimulates, MCPH1  
16 suppresses [Fig S3B]). If we postulate that background RI itself is  $\gamma$ H2AX-independent, we need to  
17 conclude that each of the two proteins is coincidentally recruited in some  $\gamma$ H2AX-independent  
18 manner.

19 The alternative is to suppose that at least some of the apparent genetic distinctions between RI and S-  
20 RI are misleading, or that they stem from the factors that are beyond the simple “[DSB] • [ecDNA] →  
21 end joining → insertion” model. As an example of the former, the concentration of background DSBs  
22 in the *H2ax*<sup>-/-</sup> cells (known to be genetically unstable), could be so high as to reach the saturation state  
23 that is responsible for the plateauing of the dose-response curve. However, our broad-dose  
24 experiment argues against this explanation [Fig 2D]. Factors outside of the DSB repair paradigm may  
25 include alteration of the cellular state due to DNA damage and antiviral defense checkpoint  
26 inductions we alluded to in the discussion of the dose-response plateau, role of H2AX and its  
27 interactors in transport, chromatinization, persistence and integrity of the ecDNA, etc. Further genetic  
28 exploration of the RI and S-RI phenomena should provide important clues. It is particularly interesting  
29 to trace the connection between the upstream signaling proteins (H2AX, MDC1) and the end-joining  
30 proteins responsible for the insertion reaction (Pol  $\theta$  and canonical NHEJ).

## 31 Implications

32 Our results have several important implications. If the robust stimulation of insertional mutagenesis  
33 by the doses well below what is currently considered harmful is not limited to cultured cells, it will be  
34 important to consider elevated episomal DNA concentration – for example from viral infection – as a  
35 confounding factor in assessing the risks of low dose irradiation. The S-RI assay is macroscopic and

1 thus simpler than direct and surrogate mutagenesis assays and damage detection methods (DNA  
2 damage response foci counting), and is as sensitive as the alternatives. A high throughput version of it  
3 can be developed for determining chemical genotoxicity at physiologically relevant concentrations. It  
4 should be stressed that the assay detects irreversible mutagenic events rather than damage that may  
5 or may not be repaired.

6 Analysis of the genetic dependencies of S-R1 revealed several unexpected findings, and demonstrated  
7 that it provides tools to study functional interactions between the components of the convoluted  
8  $\gamma$ H2AX signaling pathway, NHEJ and other DSB repair proteins.

## 9 Methods

### 10 Cell lines

11 IB10 mouse ES cells, a clonal isolate of the E14 line [77], and other mouse ES cell lines used in the  
12 study were maintained on gelatinized plastic dishes as described [53]. ES cells were grown in 1:1  
13 mixture of DMEM (Lonza BioWhittaker Cat. BE12-604F/U1, with Ultraglutamine 1, 4.5 g/l Glucose)  
14 and BRL-conditioned DMEM, supplemented with 1000 U/ml leukemia inhibitory factor, 10% FCS, 1x  
15 NEAA, 200 U/ml penicillin, 200  $\mu$ g/ml streptomycin, 89  $\mu$ M  $\beta$ -mercaptoethanol. *H2ax*<sup>-/-</sup> (A) and (N) ES  
16 cells were kindly provided by the Alt and Nussenzweig laboratories, respectively [37,38]. HeLa and  
17 U2OS cells were grown in DMEM, 10% FCS, 200 U/ml penicillin, 200  $\mu$ g/ml streptomycin. AID-AsiSI-ER  
18 U2OS cells were a kind gift of Gaëlle Legube [32]. HEK293T cells were grown in DMEM, 5% FCS, 200  
19 U/ml penicillin, 200  $\mu$ g/ml streptomycin.

### 20 Generation of knock-out ES cell lines with CRISPR/Cas9

21 *Mdc1*, *Mcph1*, *53bp1* knock-out ES cells were produced by CRISPR/Cas9 stimulated gene targeting  
22 with plasmid donor [Fig S4-S5]. The CRISPR/Cas9 expression plasmid (derived from pX459 [78])  
23 contained one or two sgRNA expression cassettes. Target sequences were (PAM underlined): for  
24 *Mdc1* #2 AAGGTAGAGGGGAAATCTGAGG and #3 AACAGTAGTCCAGAAAGGTGGG within exons 3  
25 and 4; for *53bp1* #1 TAGTTGAGGTCGGCTTGAGGTG upstream of the promoter and #2  
26 CCATCAGTCAGGTCATTGAACCGG within exon 4; for *Mcph1* promoter targeting #1  
27 CCGGCGCTTAAGGCGACGAAAGG and #2 AAAGCAACTTGAGGATATGGGGG, for *Mcph1* exon 4-5 #3  
28 TGTTTCATCGGTATTCACTGCCAGG and #4 TGTGCCTGACAGCTACAGGGAGG. Donor constructs contained  
29 PGK-hyrgo (*Mdc1*) or PGK-neo (*Mcph1*, *53bp1*) selection cassettes. *Mdc1*<sup>-/-</sup>*53bp1*<sup>-/-</sup> and *Mdc1*<sup>-/-</sup>*Mcph1*<sup>-/-</sup>  
30 cells were produced from the *Mdc1*<sup>-/-</sup> cell line. For each genotype two to four independent clones  
31 were used in experiments.

32 For H2ax complementation NotI-linearized *Rosa26* [79] targeting vectors containing the human H2AX  
33 CDS under the *H2ax* promoter and with *H2ax* 3'UTR were electroporated into  $\sim 1\text{-}2 \times 10^7$  *H2ax*<sup>-/-</sup>(N) ES  
34 cells. The vectors were derived from *Rosa26* gene targeting vector pHA416 (a kind gift from Hein te

1 Riele) containing *Salmonella typhimurium* hisD coding sequence. Two days after electroporation  
2 selection with 2 or 4 mM L-histidinol (Sigma, H6647) was started. Media was replaced every 2-4 days  
3 for 10-14 days; colonies were picked and expanded. Single copy integration into the *Rosa26* locus was  
4 confirmed by DNA hybridization on BamHI-digested genomic DNA with a 5' probe (PstI-Sall fragment,  
5 from pHA607 [80]). H2AX expression was verified by immunoblotting with anti- $\gamma$ H2AX (Millipore  
6 mouse mAb clone JBW301) or anti-total H2AX antibody (Cell Signaling rabbit polyclonal #2595).

## 7 Constructs

8 Constructs used in this study were generated by homology-based cloning methods: SLIC [81], In-  
9 Fusion (Clontech), isothermal Gibson assembly [82] or recombineering with mobile reagents [83].  
10 Pfx50 polymerase (Invitrogen) was used for PCR amplification of the construction elements in most  
11 cases, Phusion (Finnzymes) or Platinum Taq (Invitrogen) polymerase were used to amplify from  
12 genomic DNA or cDNA. Constructs were partially sequenced to verify the ligation junctions and  
13 ensure the absence of PCR-induced mutations. Maps and details are available upon request. List of  
14 oligonucleotides and constructs is provided in Supplementary data file 1.

15 pLPL, the construct used in the majority of S-RI experiments, was derived from the construct loxP-  
16 PGK-gb2-neo-polyA-loxP cassette in pGEM-T Easy originally designed to engineer knock-out alleles  
17 using recombineering (Francis Stewart lab, distributed at 2007 EuTRACC workshop on  
18 recombineering), referred to as pLNL. A dual (bacterial (gb2) and eukaryotic (PGK)) promoter drives  
19 the antibiotic resistance gene allowing selection in both hosts. Neomycin phosphotransferase (*neo*)  
20 was replaced with puromycin N-acetyltransferase (*pac*, *puro*) or hygromycin phosphotransferase  
21 (*hygro*) using recombineering to produce pLPL and pLHL, respectively. For linearization pLPL was  
22 digested with DraI, phenol-extracted, precipitated with isopropanol and dissolved in deionized water.

23 *H2ax* complementation constructs used to insert a single copy of the human or mouse *H2AX* CDS  
24 under native mouse *H2ax* promoter and 3'UTR were engineered by replacing the backbone and  
25 removing the PGK-polyA cassette from the pHA416 vector (a gift from Hein te Riele) to create a  
26 unique XhoI site between the histidinol trap cassette and the 3' homology arm (pAZ025). A 1721-bp  
27 fragment of the mouse *H2ax* locus was PCR-amplified using H2AXwhole-F/-R primers first into a  
28 shuttle vector, and then re-cloned into pAZ025, resulting in pAZ026. Analogous constructs were  
29 engineered with human H2AX and its mutants by PCR amplification of the promoter and UTR regions  
30 from pAZ026 and coding sequences from the corresponding pMSCVpuro constructs [43] (pAZ080-  
31 pAZ085); Y142A mutation was added by site-directed mutagenesis (pAZ122).

## 32 S-RI assays

33 Drug resistant colony formation was used as a measure of stable RI frequency in the majority of  
34 experiments. In a typical experiment  $6 \times 10^6$  mouse ES cells were electroporated in 450  $\mu$ l growth  
35 media with 10  $\mu$ g circular or linearized pLPL (*puro*) or pAZ095 (GFP, *puro*) plasmid DNA using

1 GenePulser Xcell apparatus (118 V, 1200  $\mu$ F,  $\infty$   $\Omega$ , exponential decay). pEGFP-N1 plasmid (10  $\mu$ g) was  
2 co-electroporated with pLPL to estimate transfection efficiency in the experiments, where absolute  
3 targeting efficiency was determined. In the initial experiments electroporated cells were re-  
4 suspended in 37-68 ml growth media; the suspension was distributed over 5-8 10 cm dishes at 7 ml  
5 per dish. In later experiments, involving larger number of cell lines, electroporated cells were re-  
6 suspended in media and equally distributed into 1.5 ml microcentrifuge or 0.2 ml PCR tubes at 0.1-1  
7 ml per tube. Cells were irradiated within 1 hr after seeding with different doses using  $^{137}$ Cs source  
8 (Gammacell) or X-ray apparatus (RS320, Xstrahl). A metal attenuator reducing the dose rate by  $\sim$ 50%  
9 was used to deliver doses  $<$ 100 mGy in low-dose irradiation experiments with Cs source. For micro-CT  
10 irradiation cells in 6 cm culture dishes or in 1.5 ml microcentrifuge tubes were scanned (Quantum FX,  
11 Perkin Elmer) in the low resolution mode (73 mm f.o.v., 17 sec, 148 mm pixel size), repeatedly 1-5  
12 times. The initial number of cells used for electroporation was increased to compensate for low  
13 plating efficiency of some knock-out cell-lines (e.g. *H2ax*<sup>-/-</sup> and their derivatives). After irradiation in  
14 microtubes cells were plated in 10 ml media in 10 cm dishes. To estimate plating efficiency at various  
15 irradiation doses 2-4  $\mu$ l aliquots of irradiated cell suspension was plated into 6-well plates in  
16 triplicates. Puromycin (1.5  $\mu$ g/ml) selection was started one day after electroporation; media was  
17 changed as required until macroscopically visible colonies were formed. Colonies were washed with  
18 PBS, stained with Coomassie Brilliant Blue (100 mg/l in 40% methanol, 10% acetic acid), and counted  
19 directly or after photographing. Colony counts were adjusted for transfection and plating efficiencies.  
20 RI stimulation was determined by dividing the adjusted number of colonies in irradiated plate by the  
21 adjusted number of colonies in unirradiated control. For plotting, averaged data from biological  
22 replicates and was fitted with a sigmoid curve using the “[Agonist] vs. response” function in GraphPad  
23 Prism software v8. Statistically significant differences in background integration frequency between  
24 wild type and mutant lines were determined by one-way ANOVA with Dunnett’s multiple  
25 comparisons test and are indicated with asterisks (\*  $p \leq 0.05$ , \*\*  $p \leq 0.01$ , \*\*\*  $p \leq 0.001$ , \*\*\*\*  $p \leq$   
26 0.0001).

27 To determine the effect of DNA amount, 400  $\mu$ l of  $15 \times 10^6$  per ml cell suspension were  
28 electroporated with 2, 5, 10, 50 or 100  $\mu$ g linearized pLPL DNA and diluted in different volumes (1, 1,  
29 2.5, 5, 8 ml, respectively) of media to account for differences in background RI and produce  
30 approximately similar colony densities in unirradiated dishes; 150  $\mu$ l aliquots of the diluted  
31 suspension were distributed into 8 PCR tubes, which were irradiated with 0–500 mGy and seeded into  
32 10 cm dishes with 10 ml growth media; 5  $\mu$ l and 50  $\mu$ l aliquots were taken from the dishes irradiated  
33 with lowest and highest doses, seeded in triplicates into 6-well plates and used to estimate plating  
34 efficiency without selection and clonogenic survival. Colony numbers in 10 cm dishes after selection  
35 were adjusted for dilution and survival, and normalized to unirradiated control as in other  
36 experiments. Two independent experiments were performed.

1 For etoposide treatment, electroporated cells were seeded into 10 cm dishes containing a range of  
2 etoposide (Sigma E1383, stock solution 10 mM in DMSO) concentrations in 10 ml media; after seeding  
3 5  $\mu$ l and 50  $\mu$ l aliquots were taken and plated in triplicate into 6-well plates containing 2 ml media  
4 with the same etoposide concentration; media was replaced next day and selection started in 10 cm  
5 dishes. Colony counts were adjusted for survival and normalized to untreated control. In the  
6 experiments involving kinase inhibitors, the stock solutions of chemicals (Ku-55933 10 mM in DMSO,  
7 VE-821 10 mM in DMSO, caffeine 40 mM in ES media, UCN-01 100  $\mu$ M in DMSO, Wortmannin 1 mM  
8 in DMSO) were added to the media after seeding; 6 hr later media was collected and replaced with  
9 fresh media; collected media was centrifuged to pellet the cells, which were returned to the dish.

10 For FACS-based S-RI assays cells were electroporated with pEGFP-N1 or pAZ095, plated into 6 cm  
11 dishes at  $3\text{-}6 \times 10^5$  per dish and irradiated. One or two days later the percentage of GFP-positive cells  
12 was determined (transient transfection efficiency). Upon reaching confluence cells were replated at  
13 1:5-1:10 dilution into 6-well plates; this was repeated until 10-14 days after transfection at which  
14 point the percentage of GFP-positive cells (RI frequency) was measured.

## 15 Immunoblotting

16 Immunoblotting was performed following standard protocol by wet transfer to nitrocellulose or PVDF  
17 membrane, blocking and antibody dilution solution contained 5% dry skim milk, 0.05% Tween 20 in  
18 PBS. Secondary antibodies were either HRP-conjugated detected with ECL (GE), or fluorescent (Sigma,  
19 anti-mouse CF680 SAB4600199, anti-rabbit CF770 SAB4600215) detected with Odyssey CLx scanner  
20 (LiCOR). Primary antibodies: 53BP1 (Novus Biologicals, NB100-304), H2AX (Cell Signaling, #2595),  
21  $\gamma$ H2AX (pS139, Millipore JBW301), MDC1 ("exon8", Abcam, ab11171 and P2B11, Millipore, 05-1572),  
22 MCPH1 (Cell Signaling, #4120), Cyclin A (Santa Cruz, C-19), PARP-1 (ENZO, C-2-10).

## 23 Virus production

24 For rAAV production a confluent 10 cm dish of HEK293T cells was trypsinized and seeded at 1:2  
25 dilution into a fresh 10 cm dish with 17 ml growth media. Calcium phosphate transfection was  
26 performed by mixing 10  $\mu$ g each of the packaging (pHelper and pAAV-RC2) and 10  $\mu$ g rAAV genome  
27 encoding GFP (pAAV-GFP) plasmids, 100  $\mu$ l 2.5 M  $\text{CaCl}_2$ , deionised water to 1 ml; then 1 ml 2xHBS  
28 (16.4 g/l NaCl, 11.9 g/l HEPES, 0.21 g/l  $\text{Na}_2\text{HPO}_4$ ; pH7.1 with NaOH) was added while bubbling air  
29 through the solution. The transfection mix was added dropwise to the cells. Media was changed next  
30 day and  $10^6$  HeLa cells were seeded for infection. Two days after transfection HEK293T cells were  
31 washed and dispersed with PBS containing 10 mM EDTA, pelleted, re-suspended in 1 ml media, frozen  
32 on dry ice/ethanol bath and thawed at 37  $^\circ\text{C}$ ; the freeze-thaw cycle was performed the total of four  
33 times. Lysate was centrifuged at 10,000 rcf for 10 min. Half of the lysate was used to infect the HeLa  
34 cells. One day after infection HeLa cells were trypsinized and counted, divided over 10-15 10-cm  
35 dishes, which were irradiated with various doses. An aliquot was analyzed by FACS to determine the

1 transduction efficiency. On days 5-8 cells were checked and passaged if confluent. FACS analysis to  
2 determine the fraction of cells still expressing GFP was performed on days 8 to 13.

3 D64V mutation inactivating the integrase was introduced into lentiviral packaging plasmid  
4 pMDLg/pRRE by replacing the AgeI-AflIII fragment with two overlapping PCR products, with mutation  
5 in the overlap, using Gibson assembly (pAZ139). HEK293T cells were transfected by calcium  
6 phosphate precipitation as described above with the third generation lentiviral packaging constructs  
7 pRSV-Rev, pMDLg/pRRE D64V (pAZ139) [84], and the plasmid encoding lentiviral genome with PGK-  
8 puroR (pLKO.1) alone or additionally with CMV-TurboGFP (SHC003, Sigma). Virus containing media  
9 was collected on days 2 and 3 after transfection, diluted 1:2 with the appropriate growth media and  
10 used to infect IB10 or HeLa cells (2x 10 cm-dishes). One day after the second infection the target cells  
11 were collected, pooled, distributed over three 145-mm dishes and irradiated with 0, 100, 400 mGy.  
12 Puromycin selection was started one day after irradiation.

## 13 14 Acknowledgements

15 We thank Andre Nussenzweig and Frederick W. Alt for *H2ax*<sup>-/-</sup> lines, Francis Stewart, Hein te Riele,  
16 Titia Sixma and Alan Bradley for providing plasmid constructs, Gaëlle Legube for providing the AID-  
17 AsiSI-ER cell line, Yanto Ridwan for help with the micro-CT irradiations. This research was funded by  
18 the Gravitation program CancerGenomiCs.nl from the Netherlands Organization for Scientific  
19 Research (NWO) and is part of the Oncode Institute, which is partly financed by the Dutch Cancer  
20 Society. The research leading to these results has received funding from the European Atomic Energy  
21 Community's Seventh Framework Programme (FP7/2007-2011) under grant agreement n° 249689.

## 22 Author contributions

23 AZ and RK conceived and guided the study. AZ, MS, IB performed the experiments. AZ, MT, DvG, JE,  
24 RK supervised various parts of the study and participated in the interpretation of the results. AZ and  
25 RK wrote the manuscript, with contributions from other authors. All authors read and approved the  
26 manuscript.

## 27 Competing interests

28 Authors declare no competing interests.  
29

1 **Figures**

**Figure 1**

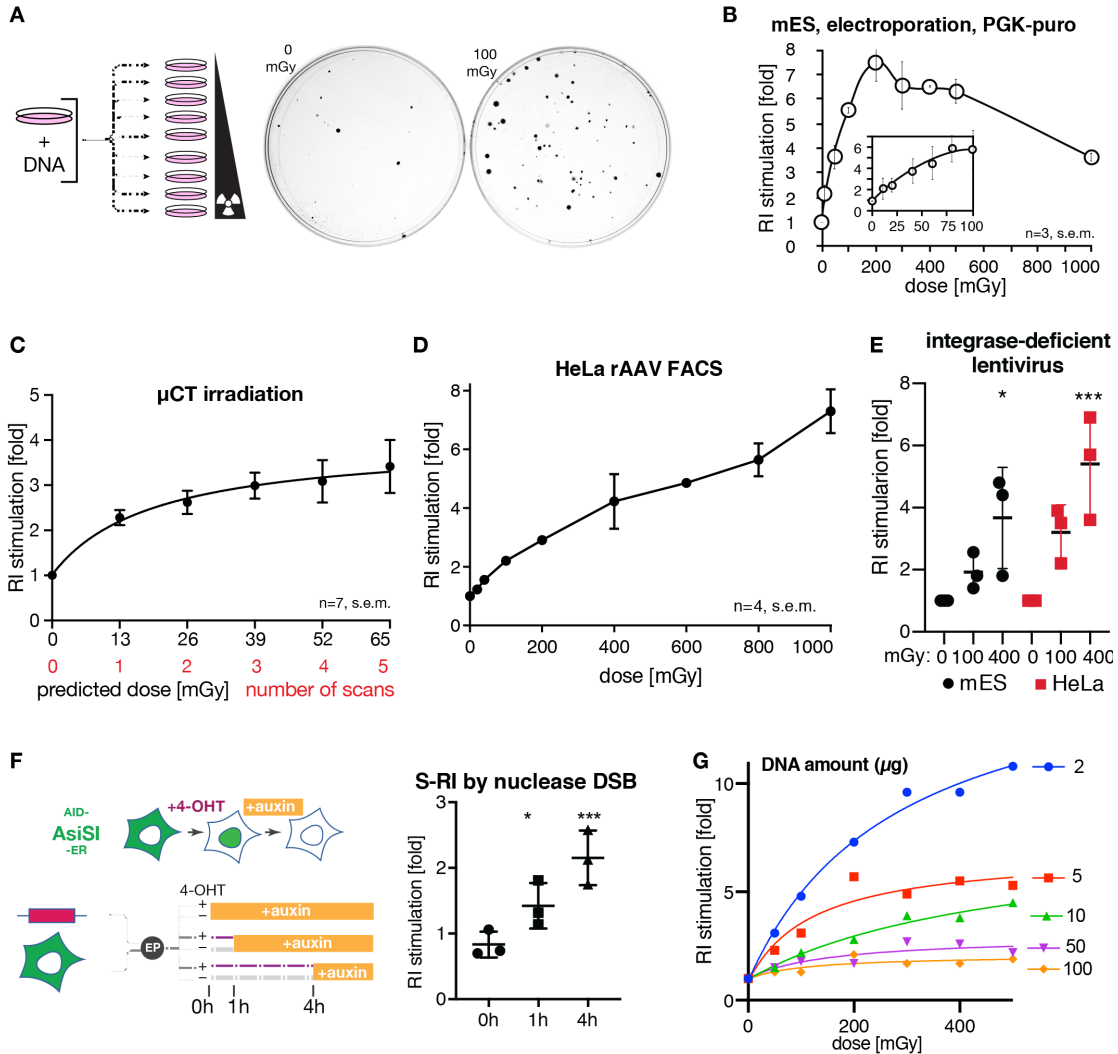

**Figure 1 RI is strongly stimulated by low doses of ionizing radiation (A)** Scheme of the typical S-R-I assay, in which antibiotic-resistant colony formation is used as an end point. Cells are transfected with linear or circular plasmid DNA, divided over a series of dishes and irradiated with different doses. After 6-8 days of antibiotic selection, plates are stained and colonies counted. Representative examples of an unirradiated plate and a plate irradiated with 100 mGy are shown at the right. **(B)** Mouse ES cells were electroporated with linearized plasmid with puromycin resistance gene. Colony numbers were normalized to unirradiated control to give the fold increase in RI efficiency, which is plotted. **(C)** mES cells were electroporated with linear or circular pLPL plasmid, divided evenly into 6 vessels, and subjected to the indicated number of low resolution micro-CT scans in a Quantum FX instrument. Indicated doses are based on manufacturer's specification.  $n=7$ , error bars show s.e.m. **(D)** S-R-I in HeLa cells infected with rAAV2-GFP and irradiated with the indicated doses one day later. Cells were maintained without selection, passaged when they reached confluency and sampled by FACS up to day 14. Representative FACS plots are shown in [Fig S1C]. The fraction of GFP positive cells in irradiated cultures normalized to unirradiated control is plotted. **(E)** S-R-I in mES and HeLa cells infected with IDLV carrying puromycin-resistance gene and irradiated with the indicated doses. Ratio of colony numbers in irradiated to unirradiated plates determined in each experiment is plotted. Statistical significance indicated by asterisks was determined by ANOVA: \*  $p \leq 0.05$ , \*\*\*  $p \leq 0.001$ . **(F)** S-R-I by nuclease DSB. AID-AsiSI-ER U2OS cells containing a stably integrated coding sequence for AsiSI nuclease tagged with auxin-inducible degron (AID) and estrogen receptor (ER) domain that triggers re-localization from cytoplasm to the nucleus upon addition of tamoxifen (4-OHT). Cells were electroporated with linearized plasmid PGK-puro DNA and seeded immediately into dishes containing either 0 or 300 nM 4-OHT. Auxin was added at the indicated time points to induce AsiSI degradation. The ratio of puromycin resistant colony numbers formed in plates that contained 300 nM 4-OHT was divided by the number of colonies in 0 nM plates. Statistical significance indicated by asterisks was determined by ANOVA: \*  $p \leq 0.05$ , \*\*\*  $p \leq 0.001$ . **(G)** Effect of the amount of transfected DNA on S-R-I efficiency determined using colony-formation S-R-I assay.



Supplementary Figure S1

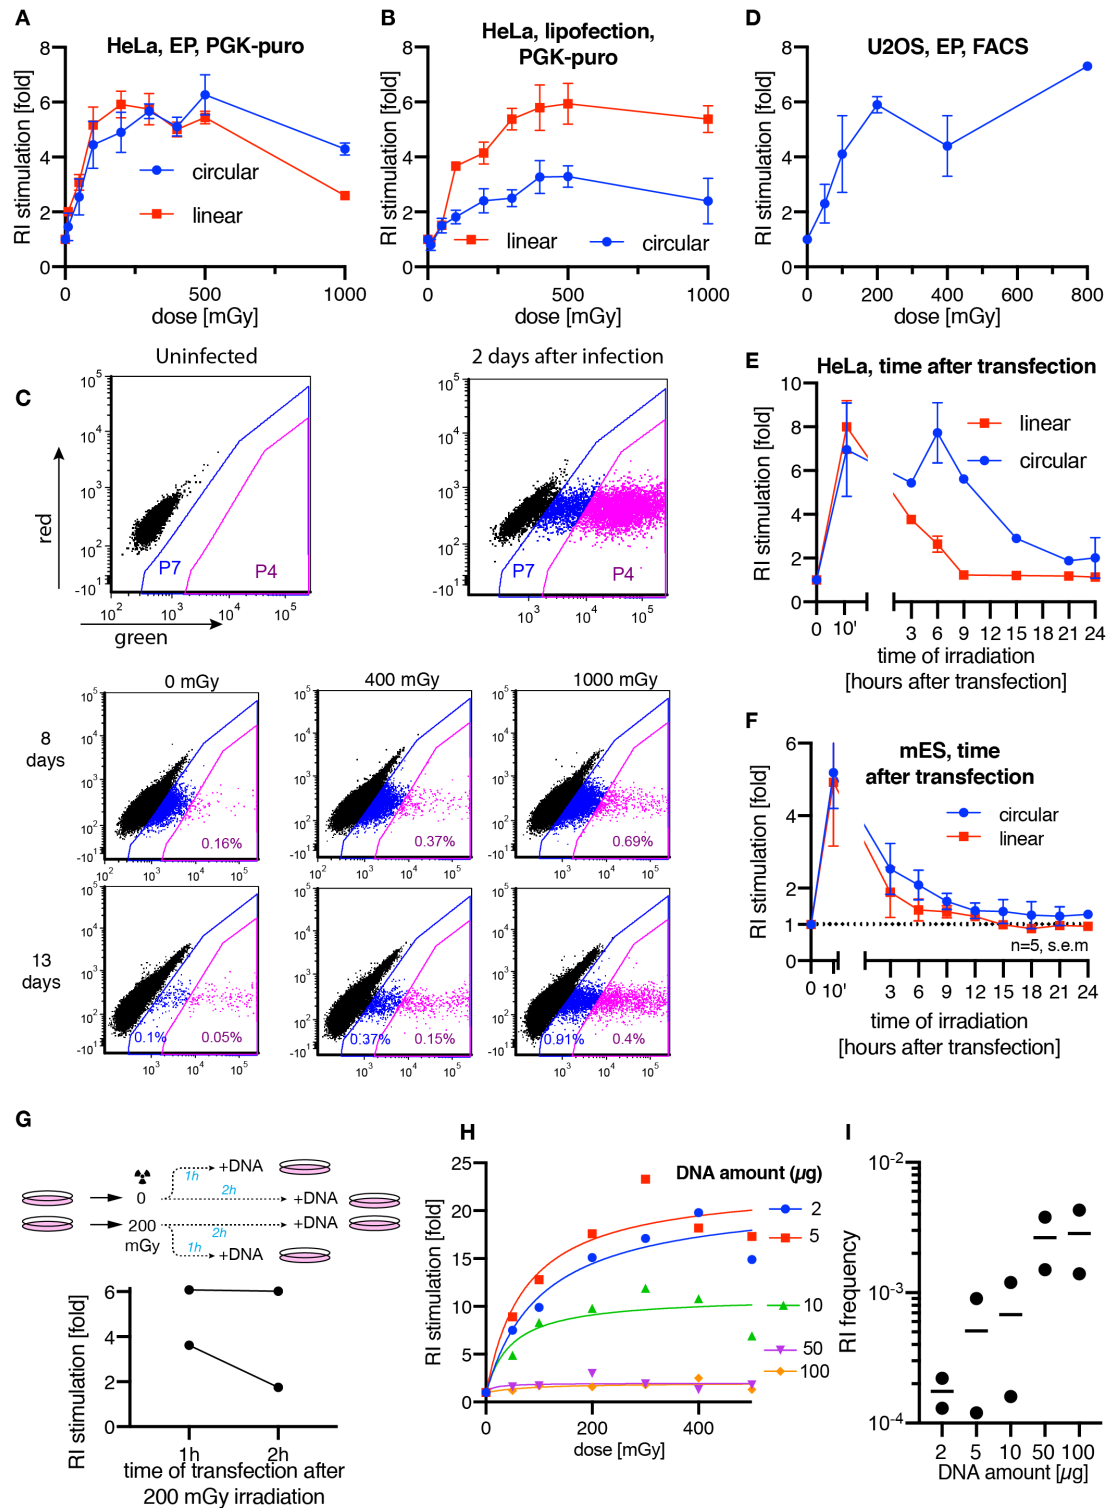

1 **Figure S1 (related to Figure 1)** (A) S-Ri in HeLa cells transfected by electroporation with linear or circular plasmid DNA carrying  
2 puromycin resistance gene under a PGK promoter. (B) S-Ri in HeLa cells transfected by lipofection. (C) Representative FACS plots  
3 from the rAAV S-Ri experiments shown in [Fig 1D]. HeLa cells infected with rAAV2-GFP virus and analyzed at different time points  
4 after infection. Gates P4 and P7 were used to calculate the fraction of high GFP-positive and all GFP-positive cells, respectively.  
5 Percentage of GFP-positive cells drops precipitously from day 2 to day 8. At 8 days post infection the broader gate (P7) still  
6 contains cells that express GFP from transient infection, while the more stringent gate contains cells stably expressing GFP. (D)  
7 FACS-based S-Ri assay performed with U2OS cells electroporated with the GFP-encoding plasmid DNA. (E) Stimulation of RI in  
8 HeLa cells electroporated with circular or linear plasmid DNA and irradiated with 0.2 Gy at different time points after  
9 electroporation. (F) Stimulation of RI in mES cells electroporated with circular or linear plasmid DNA and irradiated with 1 Gy at  
10 different time points after electroporation. Colony numbers were adjusted for reduced viability due to irradiation, and  
11 normalized to unirradiated control. (G) RI stimulation by irradiation of mES cells before transfection with linearized PGK-puro  
12 plasmid. Results of two independent experiments are plotted. (H) Repeat of the experiment shown in [Fig 1G]. (I) Background RI  
13 frequency (number of puromycin-resistant colonies per viable cell plated) from the experiments reported in [Fig 1G, S1H].



1

Figure 2

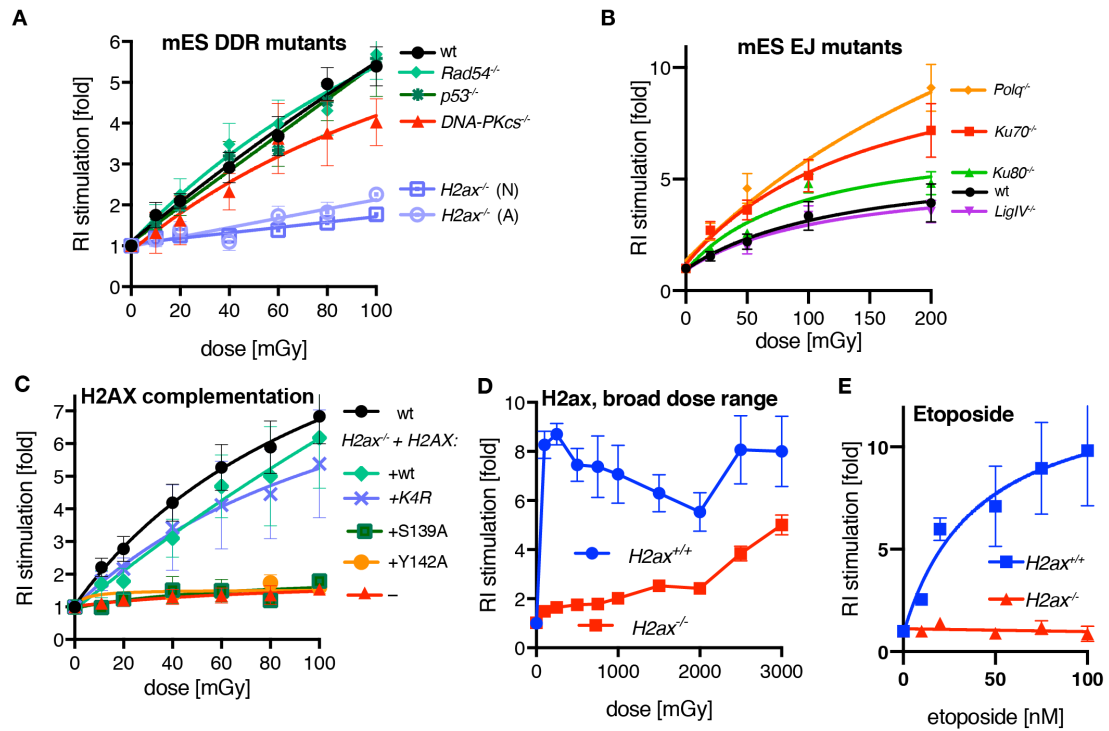

2

**Figure 2 Genetic dependencies of the IR-stimulated random integration** (A) Colony-based S-RI assay performed with mES cells deficient for key DSB repair and DNA damage response (DDR) proteins. The numbers of colonies obtained after puromycin selection were normalized to the unirradiated control. Means from at least 3 independent experiments, fitted with sigmoid curve, are plotted; error bars show s.e.m. (B) mES lines deficient for end joining proteins were assayed as in panel (A). (C) *H2ax*<sup>-/-</sup> (N) cells were complemented with versions of H2AX containing mutations in the residues involved in key post-translational modifications during the DNA damage response. A single copy of the respective *H2AX* genes was inserted in to the *Rosa26* locus. n=3, s.e.m. K4R designates a mutant in which four lysines subject to ubiquitination were replaced with arginines. (D) S-RI response to broad irradiation dose range of *H2ax*<sup>-/-</sup> and wild-type mES cells was measured in a colony-based S-RI assay. Each point represents means of at least six biological replicas, adjusted for reduced survival ([Fig S2D]), error bars indicated s.e.m. Both (N) and (A) *H2ax*<sup>-/-</sup> lines were used. (E) RI stimulation by etoposide measured by colony formation S-RI assay. Experiment was performed twice, with two independent *H2ax*<sup>-/-</sup> lines in each ((A) and (N)), data for each genotype was averaged, error bars indicate s.e.m.

15

1

Supplementary Figure S2

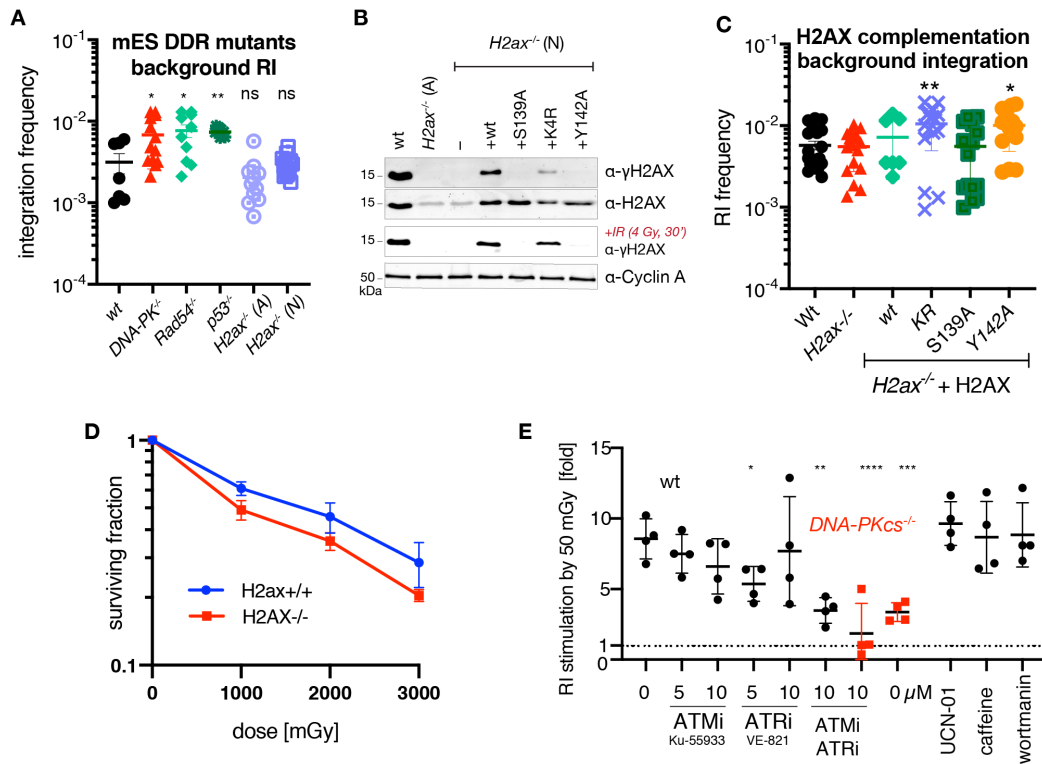

2

3 **Figure S2 Genetic dependencies of stimulated random integration (related to Figure 2)** (A) Background RI in the mutant cell  
 4 lines used in S-RI assay from [Fig 2A]. Individual values from biological replicas are plotted, with bars indicating means  $\pm$ s.e.m.  
 5 Statistical significance was determined using one-way ANOVA with Dunnett's multiple comparison test. (B) Immunoblot of *H2ax*  
 6 <sup>-/-</sup> and complemented lines. Total cell lysates from wild-type, *H2ax*<sup>-/-</sup> (A) and (N) lines, and *H2ax*<sup>-/-</sup> (N) line complemented with  
 7 various H2AX mutants, were immunoblotted with the indicated antibodies. To test yH2AX induction cells were irradiated with 4  
 8 Gy and lysed 30 minutes after. (C) Background RI measured as in panel (A) in cells used in [Fig 2C]. (D) Samples from plates used  
 9 in the S-RI assay plotted in [Fig 2D] were taken to determine the effect of irradiation on clonogenic survival of the wild-type and  
 10 *H2ax*<sup>-/-</sup> cells to compensate for loss of viability in S-RI. (E) Effect of DNA damage response kinase inhibitors on S-RI in wild-type  
 11 (black circles) and *DNA-PKcs*<sup>-/-</sup> (red squares) mES cells. Cells were electroporated with linearized plasmid, seeded into dishes  
 12 containing the indicated concentrations of the inhibitors and irradiated with 50 mGy. The chemicals were removed 6 hours later.  
 13 Data from four independent experiments is plotted.

**Figure 3**

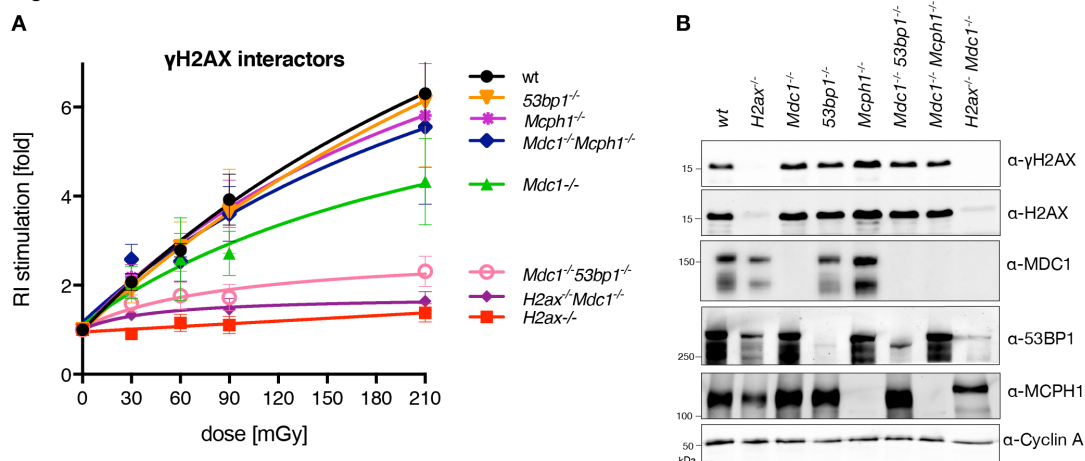

**Figure 3 S-RI dependence on  $\gamma$ H2AX-interacting proteins (A)** Colony formation-based S-RI assay was performed on mES cells in which genes encoding the three known  $\gamma$ H2AX-interacting proteins were inactivated by CRISPR/Cas9-assisted gene targeting. **(B)** Immunoblot on the whole cell lysates from the knock-out lines used in panel (A), confirming the loss of protein expression from targeted genes.

Supplementary Figure S3

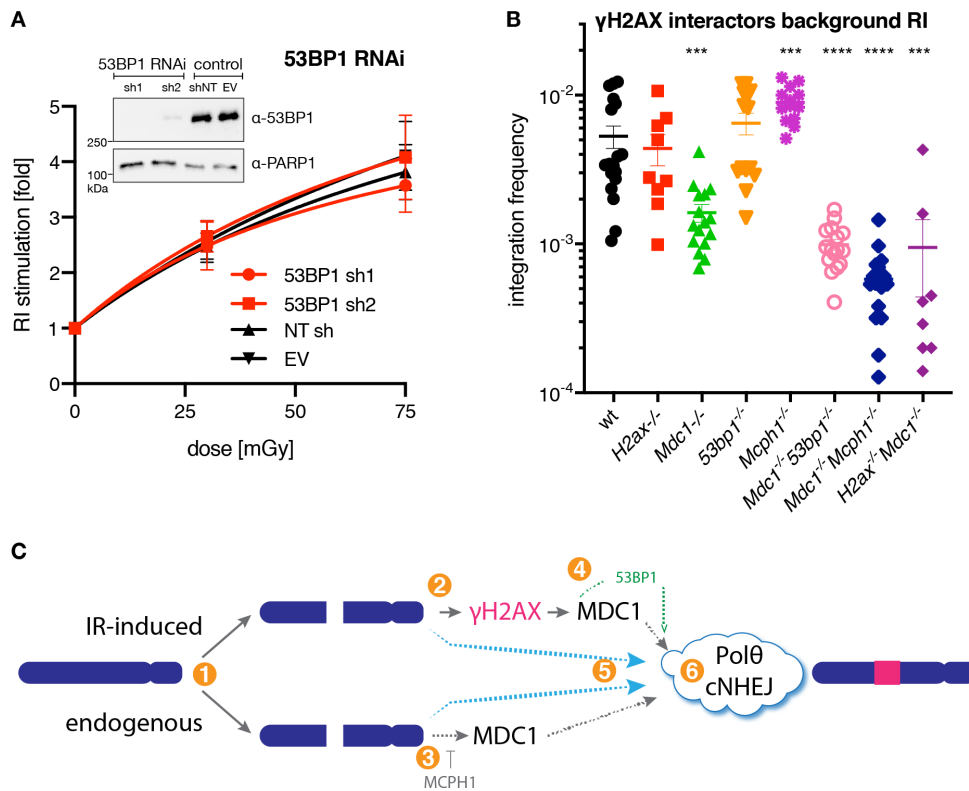

**Figure S3 (related to Figure 3)** (A) 53BP1 knock-down does not affect S-RI efficiency. Means of four independent puromycin-resistant colony formation S-RI assays (two with linearized, two with circular plasmid DNA) are plotted. Immunoblot on total cell lysates with the indicated antibodies confirming the efficiency of knock-down is shown as an inset. (B) Background RI efficiency in mES cell lines deficient for γH2AX interacting proteins. Data is plotted as in [Fig S2A]. (C) A model of RI and S-RI, based on the supposition that the initial stages of the two processes are mechanistically distinct ①, to account for the observation that S-RI is γH2AX-dependent ②, while RI is not ③; MCPH1 competes with MDC1 for γH2AX binding, and its removal results in elevated RI ③. MDC1 contributes to both RI and S-RI ④, and 53BP1 can provide a backup mechanism for S-RI in the absence of MDC1, but does not contribute to the RI process ④. Since neither RI nor S-RI are completely abolished by the deletion of the proteins listed in the scheme, alternative pathways must exist ⑤. The final ligation steps are mediated by Pol θ or cNHEJ ⑥, as we previously showed that all integration events in ES cells are abolished when both these end joining mechanisms are inactivated, however the relative contribution of Pol θ and cNHEJ to RI and S-RI may be different.

1  
2  
3  
4  
5  
6  
7  
8  
9  
10  
11  
12  
13

Supplementary Figure S4

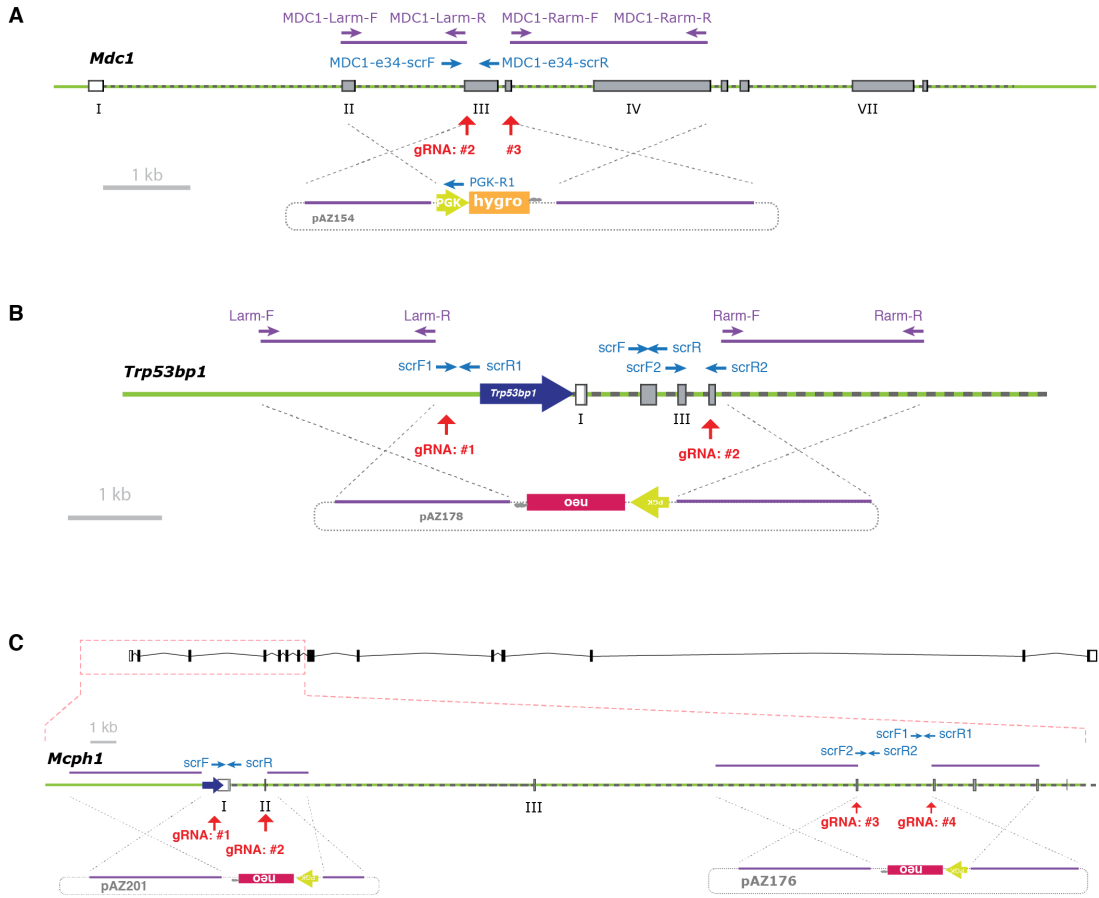

1  
2  
3  
4  
5  
6  
7  
8

**Figure S4 Generation of knock-out mES lines by CRISPR/Cas9-assisted gene targeting** Schemes of mouse loci (A) *Mdc1*, (B) *53bp1* and (C) *Mcph1* and of the corresponding gene targeting construct are shown. CRISPR/Cas9 cut sites (gRNA recognition sequences) are indicated with red arrows. Homology arms and PCR primers used to amplify them from genomic DNA for cloning into the gene targeting construct are shown as violet bars and arrows, respectively. Locations of the PCR primers used to screen for homozygously targeted clones are shown as blue arrows. Endogenous and synthetic promoters are shown as thick arrows. Exons and antibiotic resistance genes are shown as bars.

Supplementary Figure S5

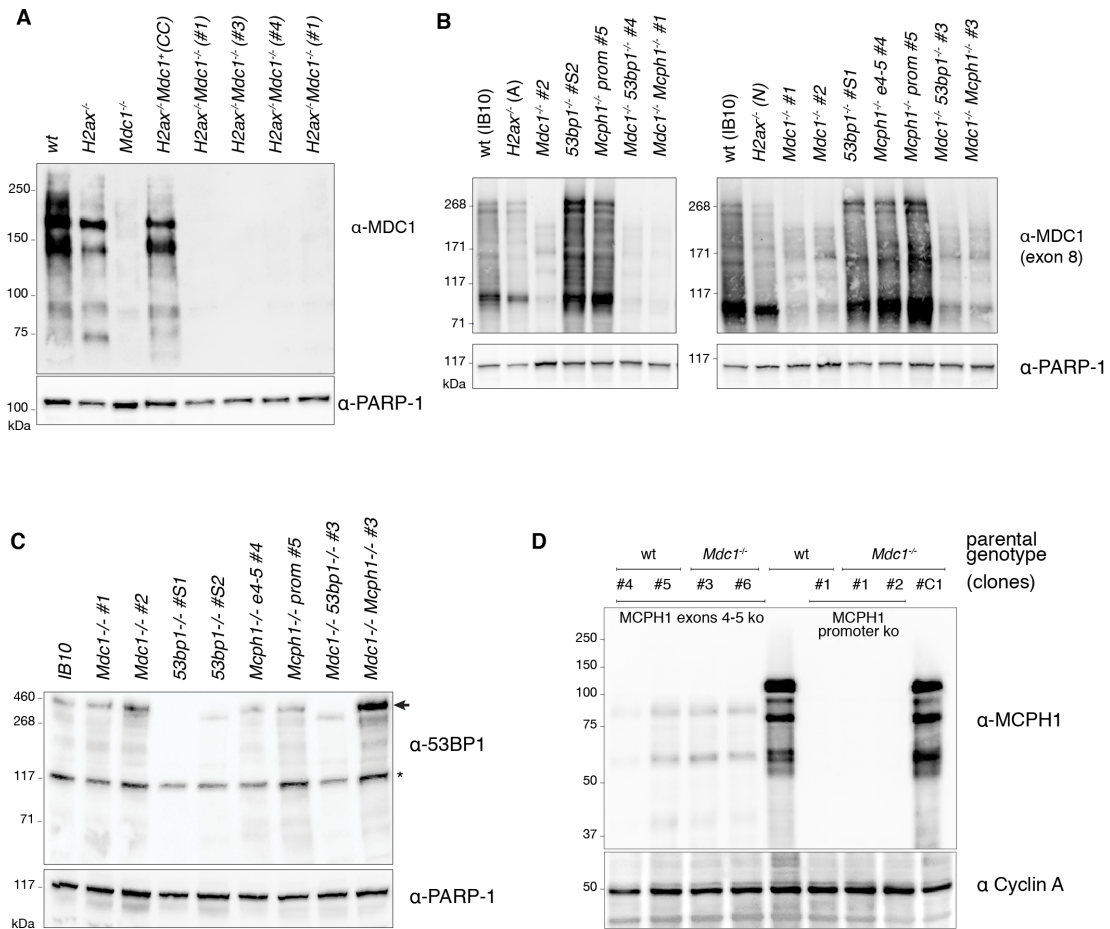

**Figure S5 Immunoblots confirming the loss of protein expression from targeted genes** Total cell extracts from the mES cell lines with indicated genotypes were fractionated by SDS-PAGE and immunoblotted with the indicated antibodies: (A) anti-MDC1 monoclonal and (B) polyclonal raised against the region encoded by exon 8, (C) anti-53BP1 and (D) anti-MCPH1. Membranes were re-probed with anti-PARP-1 antibody to assess relative loading. For each genotype at least two independent clones used in the experiments were tested. Clones that were derived from the CRISPR/Cas9-assisted gene targeting procedure but retained the wild-type allele (as determined by PCR genotyping) were used as controls in some experiments; these are indicated with letter C. Asterisk indicates non-specific band.

1

## 2 References

3

- 4 1. Uren AG, Kool J, Berns A, van Lohuizen M. Retroviral insertional mutagenesis: past, present  
5 and future. *Oncogene*. Nature Publishing Group; 2005;24: 7656–7672.  
6 doi:10.1038/sj.onc.1209043
- 7 2. Chen Y, Williams V, Filippova M, Filippov V, Duerksen-Hughes P. Viral Carcinogenesis: Factors  
8 Inducing DNA Damage and Virus Integration. *Cancers*. Multidisciplinary Digital Publishing  
9 Institute; 2014;6: 2155–2186. doi:10.3390/cancers6042155
- 10 3. Capecchi MR. Altering the genome by homologous recombination. *Science*. 1989;244: 1288–  
11 1292.
- 12 4. Nabetani A, Ishikawa F. Unusual telomeric DNAs in human telomerase-negative immortalized  
13 cells. *Mol Cell Biol*. 2009;29: 703–713. doi:10.1128/MCB.00603-08
- 14 5. Schnepf BC, Jensen RL, Chen C-L, Johnson PR, Clark KR. Characterization of adeno-associated  
15 virus genomes isolated from human tissues. *J Virol*. American Society for Microbiology;  
16 2005;79: 14793–14803. doi:10.1128/JVI.79.23.14793-14803.2005
- 17 6. Bergsmedh A, Szeles A, Henriksson M, Bratt A, Folkman MJ, Spetz AL, et al. Horizontal transfer  
18 of oncogenes by uptake of apoptotic bodies. *Proc Natl Acad Sci USA*. 2001;98: 6407–6411.  
19 doi:10.1073/pnas.101129998
- 20 7. Shibata Y, Kumar P, Layer R, Willcox S, Gagan JR, Griffith JD, et al. Extrachromosomal  
21 microDNAs and chromosomal microdeletions in normal tissues. *Science*. 2012;336: 82–86.  
22 doi:10.1126/science.1213307
- 23 8. Würtele H, Little KCE, Chartrand P. Illegitimate DNA integration in mammalian cells. *Gene*  
24 *Ther*. Nature Publishing Group; 2003;10: 1791–1799. doi:10.1038/sj.gt.3302074
- 25 9. Kamekawa H, Kurosawa A, Umehara M, Toyoda E, Adachi N. Endogenous Factors Causative of  
26 Spontaneous DNA Damage that Leads to Random Integration in Human Cells. *Gene*  
27 *Technology*. 2013;02: 1–5. doi:10.4172/2329-6682.1000105
- 28 10. Hillman GG, Xu M, Wang Y, Wright JL, Lu X, Kallinteris NL, et al. Radiation improves  
29 intratumoral gene therapy for induction of cancer vaccine in murine prostate carcinoma. *Hum*  
30 *Gene Ther*. 2003;14: 763–775. doi:10.1089/104303403765255156
- 31 11. Kiechle M, Manivasakam P, Eckardt-Schupp F, Schiestl RH, Friedl AA. Promoter-trapping in  
32 *Saccharomyces cerevisiae* by radiation-assisted fragment insertion. *Nucleic Acids Res*.  
33 2002;30: e136.
- 34 12. Stevens CW, Puppi M, Cerniglia GJ. Time-dose relationships in radiation-enhanced integration.  
35 *Int J Radiat Biol*. 2001;77: 841–846. doi:10.1080/09553000110053882
- 36 13. Zeng M, Cerniglia GJ, Eck SL, Stevens CW. High-efficiency stable gene transfer of adenovirus  
37 into mammalian cells using ionizing radiation. *Hum Gene Ther*. 1997;8: 1025–1032.  
38 doi:10.1089/hum.1997.8.9-1025
- 39 14. Iwamoto R, Fushimi K, Hiraki Y, Namba M. Enhancement of DNA-transfection frequency by X-  
40 rays. *Acta Med Okayama*. 1997;51: 19–23.

- 1 15. Stevens CW, Zeng M, Cerniglia GJ. Ionizing radiation greatly improves gene transfer efficiency  
2 in mammalian cells. *Hum Gene Ther.* 1996;7: 1727–1734. doi:10.1089/hum.1996.7.14-1727
- 3 16. Alexander IE, Russell DW, Miller AD. DNA-damaging agents greatly increase the transduction  
4 of nondividing cells by adeno-associated virus vectors. *J Virol.* 1994;68: 8282–8287.
- 5 17. Rubin JS. Effect of gamma rays on efficiency of gene transfer in DNA repair-proficient and -  
6 deficient cell lines. *Somat Cell Mol Genet.* 1988;14: 613–621.
- 7 18. Perez CF, Botchan MR, Tobias CA. DNA-mediated gene transfer efficiency is enhanced by  
8 ionizing and ultraviolet irradiation of rodent cells in vitro. I. Kinetics of enhancement. *Radiat*  
9 *Res.* 1985;104: 200–213.
- 10 19. Debenham PG, Webb MB. The effect of X-rays and ultraviolet light on DNA-mediated gene  
11 transfer in mammalian cells. *Int J Radiat Biol Relat Stud Phys Chem Med.* 1984;46: 555–568.
- 12 20. Yang TC, Tobias CA, Blakely EA, Craise LM, Madfes IS, Perez C, et al. Enhancement effects of  
13 high-energy neon particles on the viral transformation of mouse C3H10T1/2 cells in vitro.  
14 *Radiat Res.* 1980;81: 208–223.
- 15 21. Coggin JH. Enhanced virus transformation of hamster embryo cells in vitro. *J Virol.* American  
16 Society for Microbiology (ASM); 1969;3: 458–462.
- 17 22. Pollock EJ, Todaro GJ. Radiation enhancement of SV40 transformation in 3T3 and human cells.  
18 *Nature.* 1968;219: 520–521.
- 19 23. Stoker M. EFFECT OF X-IRRADIATION ON SUSCEPTIBILITY OF CELLS TO TRANSFORMATION BY  
20 POLYOMA VIRUS. *Nature.* 1963;200: 756–758.
- 21 24. Lin EC. Radiation risk from medical imaging. *Mayo Clin Proc.* 2010;85: 1142–6– quiz 1146.  
22 doi:10.4065/mcp.2010.0260
- 23 25. Kaeppel C, Beattie SG, Fronza R, van Logtenstein R, Salmon F, Schmidt S, et al. A largely  
24 random AAV integration profile after LPLD gene therapy. *Nat Med.* 2013;19: 889–891.  
25 doi:10.1038/nm.3230
- 26 26. Miller DG, Petek LM, Russell DW. Adeno-associated virus vectors integrate at chromosome  
27 breakage sites. *Nat Genet.* 2004;36: 767–773. doi:10.1038/ng1380
- 28 27. Yáñez-Muñoz RJ, Balaggan KS, MacNeil A, Howe SJ, Schmidt M, Smith AJ, et al. Effective gene  
29 therapy with nonintegrating lentiviral vectors. *Nat Med.* 2006;12: 348–353.  
30 doi:10.1038/nm1365
- 31 28. Vargas J, Gusella GL, Najfeld V, Klotman ME, Cara A. Novel integrase-defective lentiviral  
32 episomal vectors for gene transfer. *Hum Gene Ther.* 2004;15: 361–372.  
33 doi:10.1089/104303404322959515
- 34 29. Leavitt AD, Robles G, Alesandro N, Varmus HE. Human immunodeficiency virus type 1  
35 integrase mutants retain in vitro integrase activity yet fail to integrate viral DNA efficiently  
36 during infection. *J Virol.* 1996;70: 721–728.
- 37 30. Wang X, Wang Y, Wu X, Wang J, Wang Y, Qiu Z, et al. Unbiased detection of off-target  
38 cleavage by CRISPR-Cas9 and TALENs using integrase-defective lentiviral vectors. *Nat*  
39 *Biotechnol.* 2015;33: 175–178. doi:10.1038/nbt.3127



- 1 31. Gabriel R, Lombardo A, Arens A, Miller JC, Genovese P, Kaepfel C, et al. An unbiased genome-  
2 wide analysis of zinc-finger nuclease specificity. *Nat Biotechnol.* 2011;29: 816–823.  
3 doi:10.1038/nbt.1948
- 4 32. Aymard F, Bugler B, Schmidt CK, Guillou E, Caron P, Briois S, et al. Transcriptionally active  
5 chromatin recruits homologous recombination at DNA double-strand breaks. *Nature*  
6 *Structural and Molecular Biology.* 2014;21: 366–374. doi:10.1038/nsmb.2796
- 7 33. Essers J, Hendriks RW, Swagemakers SM, Troelstra C, de Wit J, Bootsma D, et al. Disruption of  
8 mouse RAD54 reduces ionizing radiation resistance and homologous recombination. *Cell.*  
9 1997;89: 195–204.
- 10 34. Gao Y, Chaudhuri J, Zhu C, Davidson L, Weaver DT, Alt FW. A targeted DNA-PKcs-null mutation  
11 reveals DNA-PK-independent functions for KU in V(D)J recombination. *Immunity.* 1998;9:  
12 367–376.
- 13 35. Zelensky AN, Schimmel J, Kool H, Kanaar R, Tijsterman M. Inactivation of Pol  $\theta$  and C-NHEJ  
14 eliminates off-target integration of exogenous DNA. *Nat Commun. Nature Publishing Group;*  
15 2017;8: 66. doi:10.1038/s41467-017-00124-3
- 16 36. Saito S, Maeda R, Adachi N. Dual loss of human POLQ and LIG4 abolishes random integration.  
17 *Nat Commun.* 2017;8: 16112. doi:10.1038/ncomms16112
- 18 37. Bassing CH, Chua KF, Sekiguchi J, Suh H, Whitlow SR, Fleming JC, et al. Increased ionizing  
19 radiation sensitivity and genomic instability in the absence of histone H2AX. *Proc Natl Acad Sci*  
20 *USA. National Academy of Sciences;* 2002;99: 8173–8178. doi:10.1073/pnas.122228699
- 21 38. Celeste A, Petersen S, Romanienko PJ, Fernandez-Capetillo O, Chen HT, Sedelnikova OA, et al.  
22 Genomic instability in mice lacking histone H2AX. *Science.* 2002;296: 922–927.  
23 doi:10.1126/science.1069398
- 24 39. Bassing CH, Suh H, Ferguson DO, Chua KF, Manis J, Eckersdorff M, et al. Histone H2AX: a  
25 dosage-dependent suppressor of oncogenic translocations and tumors. *Cell.* 2003;114: 359–  
26 370.
- 27 40. Franco S, Gostissa M, Zha S, Lombard DB, Murphy MM, Zarrin AA, et al. H2AX prevents DNA  
28 breaks from progressing to chromosome breaks and translocations. *Mol Cell.* 2006;21: 201–  
29 214. doi:10.1016/j.molcel.2006.01.005
- 30 41. Rogakou EP, Pilch DR, Orr AH, Ivanova VS, Bonner WM. DNA double-stranded breaks induce  
31 histone H2AX phosphorylation on serine 139. *Journal of Biological Chemistry.* 1998;273:  
32 5858–5868.
- 33 42. Stewart GS, Panier S, Townsend K, Al-Hakim AK, Kolas NK, Miller ES, et al. The RIDDLE  
34 syndrome protein mediates a ubiquitin-dependent signaling cascade at sites of DNA damage.  
35 *Cell.* 2009;136: 420–434. doi:10.1016/j.cell.2008.12.042
- 36 43. Mattioli F, Vissers JHA, van Dijk WJ, Ikpa P, Citterio E, Vermeulen W, et al. RNF168  
37 ubiquitinates K13-15 on H2A/H2AX to drive DNA damage signaling. *Cell.* 2012;150: 1182–  
38 1195. doi:10.1016/j.cell.2012.08.005
- 39 44. Stucki M, Clapperton JA, Mohammad D, Yaffe MB, Smerdon SJ, Jackson SP. MDC1 directly  
40 binds phosphorylated histone H2AX to regulate cellular responses to DNA double-strand  
41 breaks. *Cell.* 2005;123: 1213–1226. doi:10.1016/j.cell.2005.09.038

- 1 45. Toyoda E, Kurosawa A, Kamekawa H, Adachi N. Topoisomerase IIalpha inhibition following  
2 DNA transfection greatly enhances random integration in a human pre-B lymphocyte cell line.  
3 *Biochem Biophys Res Commun.* 2009;382: 492–496. doi:10.1016/j.bbrc.2009.03.047
- 4 46. Aratani Y, Andoh T, Koyama H. Effects of DNA topoisomerase inhibitors on nonhomologous  
5 and homologous recombination in mammalian cells. *Mutat Res.* 1996;362: 181–191.
- 6 47. Bodley AL, Huang HC, Yu C, Liu LF. Integration of simian virus 40 into cellular DNA occurs at or  
7 near topoisomerase II cleavage hot spots induced by VM-26 (teniposide). *Mol Cell Biol.*  
8 1993;13: 6190–6200.
- 9 48. Stiff T, O'Driscoll M, Rief N, Iwabuchi K, Löbrich M, Jeggo PA. ATM and DNA-PK function  
10 redundantly to phosphorylate H2AX after exposure to ionizing radiation. *Cancer Res.* 2004;64:  
11 2390–2396.
- 12 49. Hickson I, Zhao Y, Richardson CJ, Green SJ, Martin NMB, Orr AI, et al. Identification and  
13 characterization of a novel and specific inhibitor of the ataxia-telangiectasia mutated kinase  
14 ATM. *Cancer Res.* 2004;64: 9152–9159. doi:10.1158/0008-5472.CAN-04-2727
- 15 50. Charrier J-D, Durrant SJ, Golec JMC, Kay DP, Knegt RMA, MacCormick S, et al. Discovery of  
16 potent and selective inhibitors of ataxia telangiectasia mutated and Rad3 related (ATR)  
17 protein kinase as potential anticancer agents. *J Med Chem.* 2011;54: 2320–2330.  
18 doi:10.1021/jm101488z
- 19 51. Sarkaria JN, Tibbetts RS, Busby EC, Kennedy AP, Hill DE, Abraham RT. Inhibition of  
20 phosphoinositide 3-kinase related kinases by the radiosensitizing agent wortmannin. *Cancer*  
21 *Res.* 1998;58: 4375–4382.
- 22 52. Graves PR, Yu L, Schwarz JK, Gales J, Sausville EA, O'Connor PM, et al. The Chk1 protein kinase  
23 and the Cdc25C regulatory pathways are targets of the anticancer agent UCN-01. *Journal of*  
24 *Biological Chemistry.* 2000;275: 5600–5605.
- 25 53. Zelensky AN, Sanchez H, Ristic D, Vidic I, van Rossum-Fikkert SE, Essers J, et al. Caffeine  
26 suppresses homologous recombination through interference with RAD51-mediated joint  
27 molecule formation. *Nucleic Acids Res.* 2013;41: 6475–6489. doi:10.1093/nar/gkt375
- 28 54. Tsabar M, Mason JM, Chan Y-L, Bishop DK, Haber JE. Caffeine inhibits gene conversion by  
29 displacing Rad51 from ssDNA. *Nucleic Acids Res.* 2015;43: 6902–6918.  
30 doi:10.1093/nar/gkv525
- 31 55. Tsabar M, Eapen VV, Mason JM, Memisoglu G, Waterman DP, Long MJ, et al. Caffeine impairs  
32 resection during DNA break repair by reducing the levels of nucleases Sae2 and Dna2. *Nucleic*  
33 *Acids Res.* 2015;43: 6889–6901. doi:10.1093/nar/gkv520
- 34 56. Kleiner RE, Verma P, Molloy KR, Chait BT, Kapoor TM. Chemical proteomics reveals a  $\gamma$ H2AX-  
35 53BP1 interaction in the DNA damage response. *Nat Chem Biol.* Nature Publishing Group;  
36 2015;11: 807–814. doi:10.1038/nchembio.1908
- 37 57. Wood JL, Singh N, Mer G, Chen J. MCPH1 functions in an H2AX-dependent but MDC1-  
38 independent pathway in response to DNA damage. *Journal of Biological Chemistry.* 2007;282:  
39 35416–35423. doi:10.1074/jbc.M705245200
- 40 58. Scully R, Xie A. Double strand break repair functions of histone H2AX. *Mutat Res.* 2013;750: 5–  
41 14. doi:10.1016/j.mrfmmm.2013.07.007

- 1 59. Chen W-T, Alpert A, Leiter C, Gong F, Jackson SP, Miller KM. Systematic identification of  
2 functional residues in mammalian histone H2AX. *Mol Cell Biol.* 2013;33: 111–126.  
3 doi:10.1128/MCB.01024-12
- 4 60. Revet I, Feeney L, Bruguera S, Wilson W, Dong TK, Oh DH, et al. Functional relevance of the  
5 histone gammaH2Ax in the response to DNA damaging agents. *Proc Natl Acad Sci USA.*  
6 *National Academy of Sciences;* 2011;108: 8663–8667. doi:10.1073/pnas.1105866108
- 7 61. Sonoda E, Zhao GY, Kohzaki M, Dhar PK, Kikuchi K, Redon C, et al. Collaborative roles of  
8 gammaH2AX and the Rad51 paralog Xrcc3 in homologous recombinational repair. *DNA Repair*  
9 *(Amst).* 2007;6: 280–292. doi:10.1016/j.dnarep.2006.10.025
- 10 62. Celeste A, Fernandez-Capetillo O, Kruhlak MJ, Pilch DR, Staudt DW, Lee A, et al. Histone H2AX  
11 phosphorylation is dispensable for the initial recognition of DNA breaks. *Nat Cell Biol.* Nature  
12 Publishing Group; 2003;5: 675–679. doi:10.1038/ncb1004
- 13 63. Xie A, Puget N, Shim I, Odate S, Jarzyna I, Bassing CH, et al. Control of sister chromatid  
14 recombination by histone H2AX. *Mol Cell.* 2004;16: 1017–1025.  
15 doi:10.1016/j.molcel.2004.12.007
- 16 64. Xie A, Odate S, Chandramouly G, Scully R. H2AX post-translational modifications in the  
17 ionizing radiation response and homologous recombination. *Cell Cycle.* 2010;9: 3602–3610.  
18 doi:10.4161/cc.9.17.12884
- 19 65. Fernandez-Capetillo O, Chen HT, Celeste A, Ward I, Romanienko PJ, Morales JC, et al. DNA  
20 damage-induced G2-M checkpoint activation by histone H2AX and 53BP1. *Nat Cell Biol.*  
21 Nature Publishing Group; 2002;4: 993–997. doi:10.1038/ncb884
- 22 66. Xie A, Kwok A, Scully R. Role of mammalian Mre11 in classical and alternative nonhomologous  
23 end joining. *Nature Structural and Molecular Biology.* 2009;16: 814–818.  
24 doi:10.1038/nsmb.1640
- 25 67. Bañuelos CA, Banáth JP, MacPhail SH, Zhao J, Eaves CA, O'Connor MD, et al. Mouse but not  
26 human embryonic stem cells are deficient in rejoining of ionizing radiation-induced DNA  
27 double-strand breaks. *DNA Repair (Amst).* 2008;7: 1471–1483.  
28 doi:10.1016/j.dnarep.2008.05.005
- 29 68. Panier S, Boulton SJ. Double-strand break repair: 53BP1 comes into focus. *Nat Rev Mol Cell*  
30 *Biol.* Nature Publishing Group; 2014;15: 7–18. doi:10.1038/nrm3719
- 31 69. Zimmermann M, de Lange T. 53BP1: pro choice in DNA repair. *Trends Cell Biol.* 2014;24: 108–  
32 117. doi:10.1016/j.tcb.2013.09.003
- 33 70. Bunting SF, Callén E, Wong N, Chen HT, Polato F, Gunn A, et al. 53BP1 inhibits homologous  
34 recombination in Brca1-deficient cells by blocking resection of DNA breaks. *Cell.* 2010;141:  
35 243–254. doi:10.1016/j.cell.2010.03.012
- 36 71. Difilippantonio S, Gapud E, Wong N, Huang C-Y, Mahowald G, Chen HT, et al. 53BP1 facilitates  
37 long-range DNA end-joining during V(D)J recombination. *Nature.* Nature Publishing Group;  
38 2008;456: 529–533. doi:10.1038/nature07476
- 39 72. Dimitrova N, Chen Y-CM, Spector DL, de Lange T. 53BP1 promotes non-homologous end  
40 joining of telomeres by increasing chromatin mobility. *Nature.* 2008;456: 524–528.  
41 doi:10.1038/nature07433
- 42 73. Lou Z, Chen BP-C, Asaithamby A, Minter-Dykhouse K, Chen DJ, Chen J. MDC1 regulates DNA-  
43 PK autophosphorylation in response to DNA damage. *Journal of Biological Chemistry.*

- 1 American Society for Biochemistry and Molecular Biology; 2004;279: 46359–46362.  
2 doi:10.1074/jbc.C400375200
- 3 74. Stewart GS, Wang B, Bignell CR, Taylor AMR, Elledge SJ. MDC1 is a mediator of the  
4 mammalian DNA damage checkpoint. *Nature*. 2003;421: 961–966. doi:10.1038/nature01446
- 5 75. Minter-Dykhouse K, Ward I, Huen MSY, Chen J, Lou Z. Distinct versus overlapping functions of  
6 MDC1 and 53BP1 in DNA damage response and tumorigenesis. *J Cell Biol*. 2008;181: 727–735.  
7 doi:10.1083/jcb.200801083
- 8 76. Eliezer Y, Argaman L, Rhie A, Doherty AJ, Goldberg M. The direct interaction between 53BP1  
9 and MDC1 is required for the recruitment of 53BP1 to sites of damage. *Journal of Biological  
10 Chemistry*. American Society for Biochemistry and Molecular Biology; 2009;284: 426–435.  
11 doi:10.1074/jbc.M807375200
- 12 77. Hooper M, Hardy K, Handyside A, Hunter S, Monk M. HPRT-deficient (Lesch-Nyhan) mouse  
13 embryos derived from germline colonization by cultured cells. *Nature*. 1987;326: 292–295.  
14 doi:10.1038/326292a0
- 15 78. Ran FA, Hsu PD, Wright J, Agarwala V, Scott DA, Zhang F. Genome engineering using the  
16 CRISPR-Cas9 system. *Nat Protoc*. Nature Publishing Group; 2013;8: 2281–2308.  
17 doi:10.1038/nprot.2013.143
- 18 79. Soriano P. Generalized lacZ expression with the ROSA26 Cre reporter strain. *Nat Genet*.  
19 1999;21: 70–71. doi:10.1038/5007
- 20 80. Dannenberg J-H, Schuijff L, Dekker M, van der Valk M, Riele Te H. Tissue-specific tumor  
21 suppressor activity of retinoblastoma gene homologs p107 and p130. *Genes Dev*. Cold Spring  
22 Harbor Lab; 2004;18: 2952–2962. doi:10.1101/gad.322004
- 23 81. Li MZ, Elledge SJ. SLIC: a method for sequence- and ligation-independent cloning. *Methods  
24 Mol Biol*. 2012;852: 51–59. doi:10.1007/978-1-61779-564-0\_5
- 25 82. Gibson DG, Young L, Chuang R-Y, Venter JC, Hutchison CA, Smith HO. Enzymatic assembly of  
26 DNA molecules up to several hundred kilobases. *Nat Meth*. 2009;6: 343–345.  
27 doi:10.1038/nmeth.1318
- 28 83. Fu J, Anastassiadis K, Stewart AF. A recombineering pipeline to make conditional targeting  
29 constructs. *Meth Enzymol*. 2010;477: 125–144. doi:10.1016/S0076-6879(10)77008-7
- 30 84. Dull T, Zufferey R, Kelly M, Mandel RJ, Nguyen M, Trono D, et al. A third-generation lentivirus  
31 vector with a conditional packaging system. *J Virol*. 1998;72: 8463–8471.
- 32
